# Supplementary material
Source: PubMed Central journal article supplement (PMC5896295)
Supplement: NIHMS955453-supplement-supplement_1.pdf [file NIHMS955453-supplement-supplement_1.pdf]

**Supplement Table 1: SF-12 and SF-36 Mean Scores Reported in the Literature**

| <b><u>Cancer (reference)</u></b>           | <b><u>Physical Score (SD)</u></b> | <b><u>Mental Score (SD)</u></b> |
|--------------------------------------------|-----------------------------------|---------------------------------|
| General US                                 | 50 (10)                           | 50 (10)                         |
| <b>Rare cancers examined in this paper</b> |                                   |                                 |
| Hematological [15]                         | 40.1 (10.4)                       | 43.6 (10.3)                     |
| Urogenital [15]                            | 42.1 (9.8)                        | 43.4 (10.7)                     |
| Urologic [16]                              | 46.2                              | 55.3                            |
| Gynecologic [16]                           | 39.9                              | 49.4                            |
| Gastrointestinal [16]                      | 42.3                              | 51.8                            |
| RCGR Registrants                           | 44.3                              | 51.5                            |
| <b>Common cancers</b>                      |                                   |                                 |
| Colorectal [15]                            | 42.3 (9.8)                        | 44.7 (9.8)                      |
| Breast [15]                                | 42.7 (9.4)                        | 43.7(10.4)                      |
| Breast [16]                                | 42.7                              | 50.8                            |
| Prostate [15]                              | 43.3 (9.4)                        | 45.6 (9.4)                      |
| Lung/upper aero-<br>digestive tract [15]   | 38.9 (9.4)                        | 43.4 (10.7)                     |
| All cancers [16]                           | 42.79 (11.5)                      | 51.78 (9.2)                     |

\* Norms for SF-12 and SF-36 are the same
